# Supplementary material for: Molecular engineering of diketopyrrolopyrrole-conjugated polymer nanoparticles by chalcogenide variation for photoacoustic imaging guided photothermal therapy
Source: Royal Society of Chemistry journal article supplement (doi:10.1039/d1tb00193k), 2021-01-01
Supplement: d1tb00193k1.pdf [file d1tb00193k1.pdf]

## Supporting Information

### Molecular engineering of diketopyrrolopyrrole conjugated polymer nanoparticles by chalcogenide variation for photoacoustic imaging-guided photothermal therapy

Xin Jin,<sup>a,b</sup> Xiaoyi xing,<sup>a</sup> Qingyuan Deng,<sup>a</sup> Weixia Qing,<sup>\* a</sup> Zhonghua Liu<sup>\* a</sup> and Yongwei Huang<sup>a</sup>

<sup>a</sup> Laboratory for NanoMedical Photonics, School of Basic Medical Science, Henan University, Kaifeng, 475004, China

<sup>b</sup> School of Pharmacy, Henan University, Kaifeng 475004, China

#### Photothermal conversion efficiencies of DPP-SO, DPP-SS and DPP-SSe NPs

To calculate the photothermal conversion efficiency ( $\eta$ ), NPs aqueous solution ( $20 \mu\text{g mL}^{-1}$ ) was irradiated at 808 nm for 10 min, the temperature was monitored by photothermal camera every 30 s in the irradiation. After the laser exposure, the temperature was continuously monitored every 30 s for 10 min when finally cooling to room temperature. The photothermal conversion efficiencies were calculated as follows:  $\eta$  was determined according to equation (1):

$$\eta = \frac{hS\Delta T_{\max} - Q_{\text{Dis}}}{I(1 - 10^{-A_{808}})} \quad (1)$$

where  $\eta$  indicates the heat transfer coefficient,  $h$  and  $S$  are parameters related to solvent and container,  $h$  means heat transfer coefficient and  $S$  stands for surface area of the container.  $\Delta T_{\max}$  is the maximum temperature change of solvent.  $I$  stands the laser power used for irradiation,  $A_{808}$  means the absorbance of the nanoparticle aqueous solution at 808 nm.  $Q_{\text{Dis}}$  stands for the heat input due to light absorption by the solvent and container, and the  $Q_{\text{Dis}}$  was evaluated as 14 mW independently using pure water.  $hS$  can be determined by measuring the rate of temperature decrease after removing the light source according to equation (2):

$$\tau_s = \frac{m_D - C_D}{hS} \quad (2)$$

Where,  $m_D$  and  $C_D$  indicate the mass (1.0 g) and heat capacity ( $4.2 \text{ J g}^{-1}$ ) of the water in the solvent.  $\tau_s$  is the time constant for heat transfer of the system, which can be calculated according to equation (3):

$$t = -\tau_s \ln(\theta) = -\tau_s \ln \frac{T_t - T_{\text{Surr}}}{T_{\text{Max}} - T_{\text{Surr}}} \quad (3)$$

where  $\theta$  indicates the ratio of  $\Delta T$  and  $\Delta T_{\text{Max}}$ .  $t$  is the cooling time points when turn off the laser for 10 min.  $T_t$  is the corresponding temperature of PNPs during the cooling stage.  $T_{\text{Max}}$  means the maximum of the PNPs aqueous solution.  $T_{\text{Surr}}$  stands for the temperature of the surrounding environment. From a plot of time against temperature during the cooling period,  $\tau_s$  is calculated.

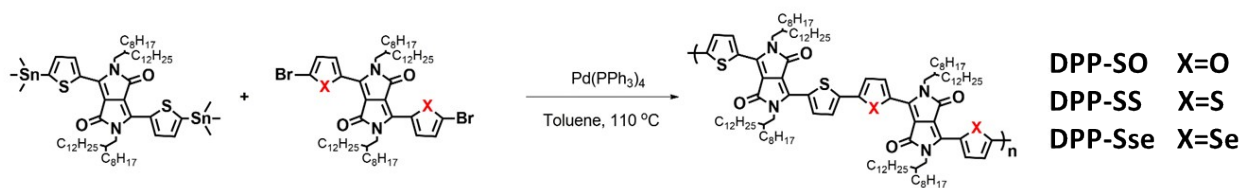

Fig. S1. Synthetic route of DPP-SO, DPP-SS and DPP-Sse

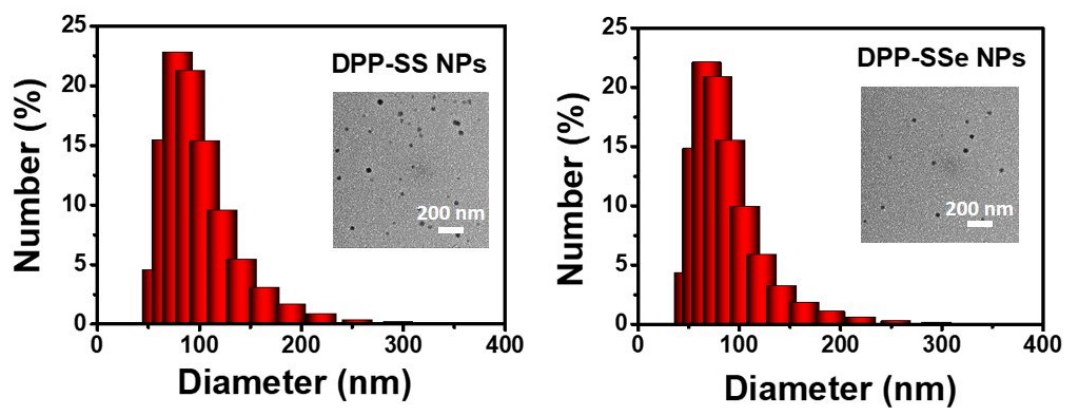

Fig. S2. DLS and TEM imaging of DPP-SS and DPP-Sse NPs aqueous solution

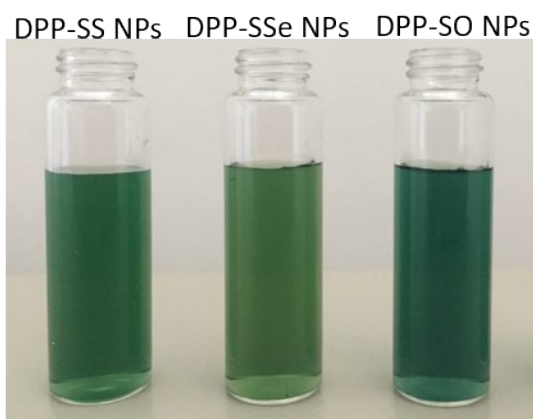

Fig. S3. The dispersibility of DPP NPs in PBS solution in 4 °C refrigerator for one month

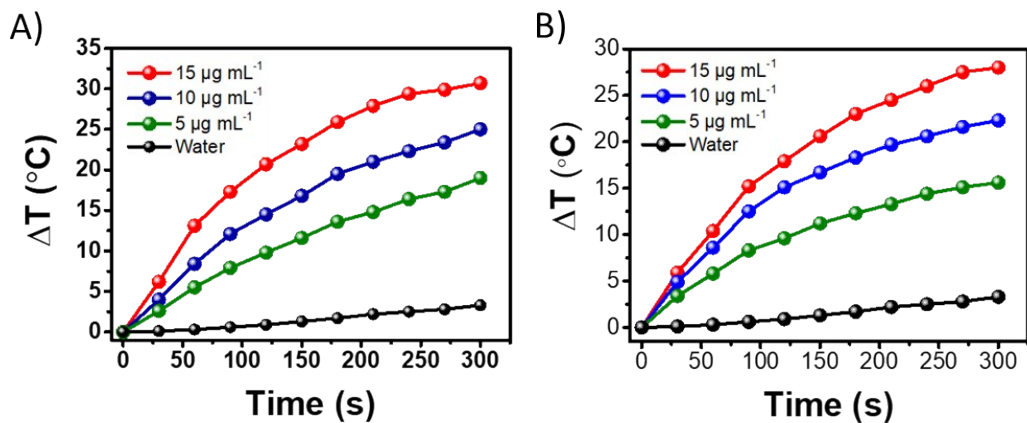

Fig. S4. Temperature elevation of (A) DPP-SS and (B) DPP-SSe NPs of various concentration

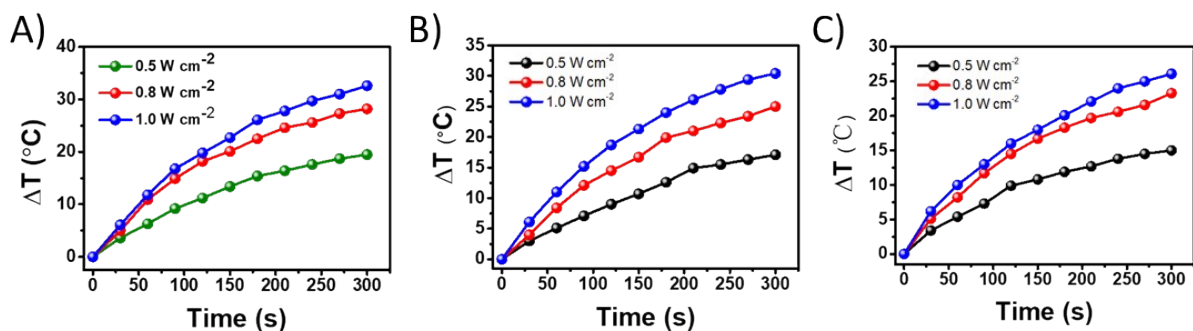

Fig. S5. Temperature profile of (A) DPP-SO, (B) DPP-SO and (C) DPP-SO NPs upon an irradiation 808 nm laser of different powers as a function of irradiation time

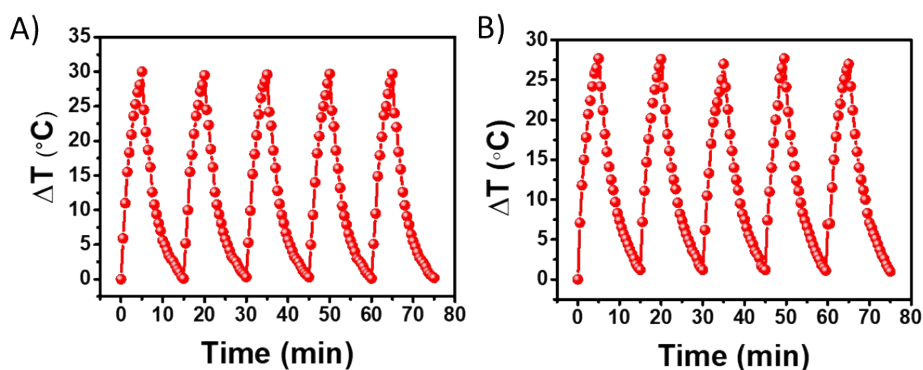

Fig. S6. Temperature elevation of (A) DPP-SS, (B) DPP-SSe NPs over five laser on/off cycles of 808 nm irradiation (0.8  $\text{W cm}^{-2}$ , 10 min)

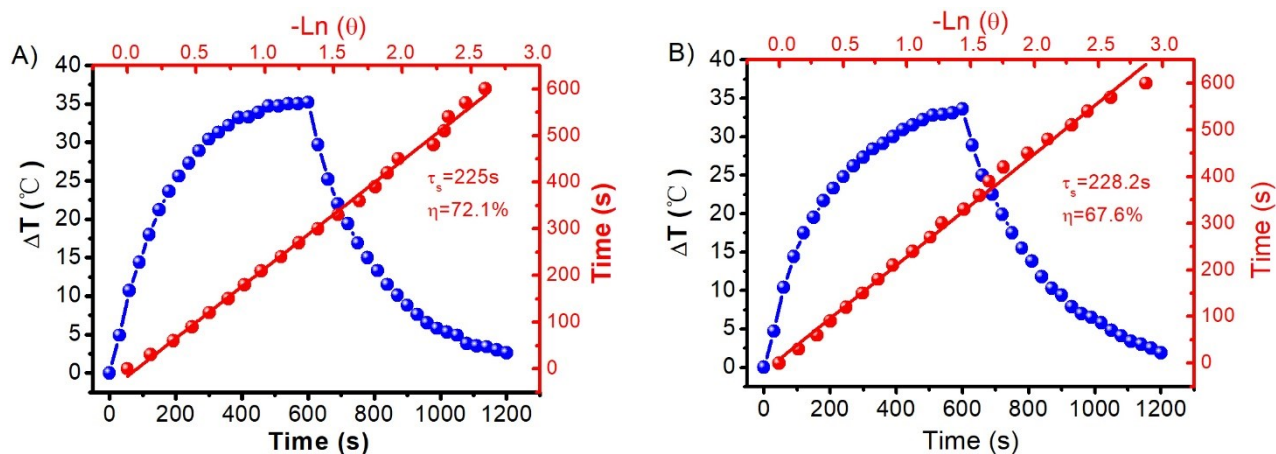

Fig. S7. Heating/cooling curves and linear analysis of (A) DPP-SS and (B) DPP-SSe NPs

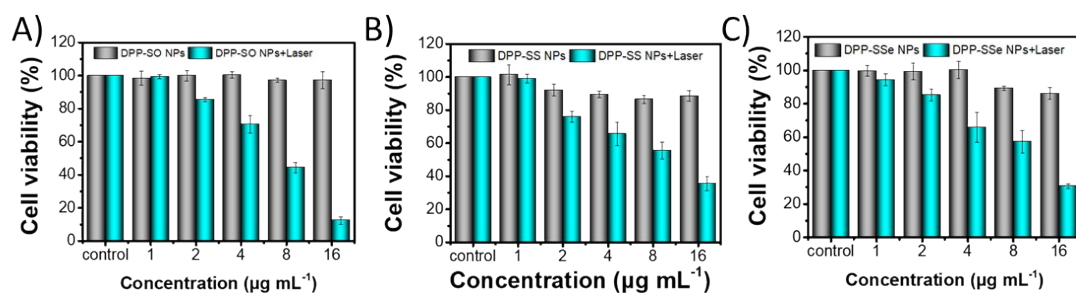

Fig. S8. (A) Viability of H446 cells after incubation with DPP-SO, DPP-SS and DPP-SSe NPs (internal concentrations of 0, 1, 2, 4, 8, 16  $\mu\text{g mL}^{-1}$ ) plus laser irradiation (808 nm, 0.8  $\text{Wcm}^{-2}$ , 5 min) for 24 h.

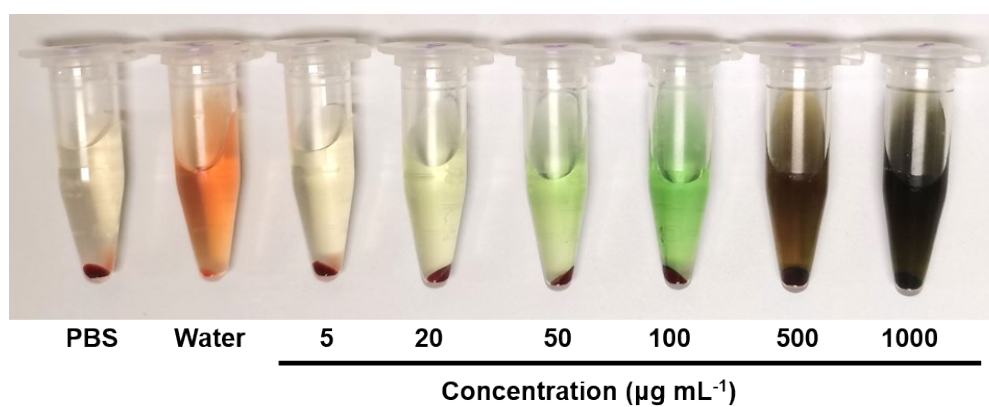

Fig.S9 Blood compatibility of DPP NPs (negative control: PBS; Positive control: pure water)

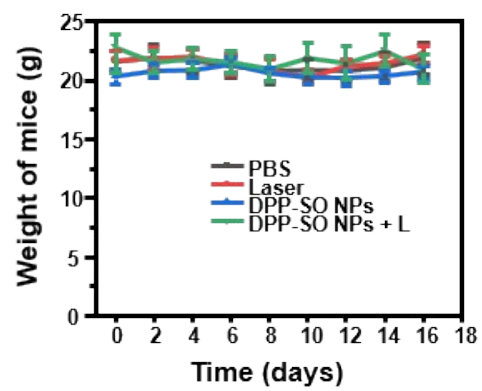

Fig. S10. Weight change of mice.
